# Supplementary material for: A biostable, anti-fouling zwitterionic polyurethane-urea based on PDMS for use in blood-contacting medical devices
Source: Royal Society of Chemistry journal article supplement (doi:10.1039/d0tb01220c), 2020-01-01
Supplement: d0tb01220c2.pdf [file d0tb01220c2.pdf]

## Supplement Figures

Title: A biostable, anti-fouling zwitterionic polyurethane-urea based on PDMS for use in blood-contacting medical devices

Seungil Kim<sup>a,b</sup>, Sang-ho Ye<sup>a,b</sup>, Ariana Adamo<sup>a,g</sup>, Ryan A Orizondo<sup>a,c,d</sup>, Jaehyuk Jo<sup>e</sup>, Sung Kwon Cho<sup>e</sup>, and William R Wagner<sup>a,b,c,f,\*</sup>

<sup>a</sup> McGowan Institute for Regenerative Medicine, University of Pittsburgh, Pittsburgh, PA, USA.

<sup>b</sup> Departments of Surgery, University of Pittsburgh, Pittsburgh, PA, USA

<sup>c</sup> Departments of Bioengineering, University of Pittsburgh, Pittsburgh, PA, USA

<sup>d</sup> Department of Medicine, University of Pittsburgh, Pittsburgh, PA, USA

<sup>e</sup> Department of Mechanical Engineering & Materials Science, University of Pittsburgh, Pittsburgh, PA, USA

<sup>f</sup> Departments of Chemical and Petroleum Engineering, University of Pittsburgh, Pittsburgh, PA, USA

<sup>g</sup> Department of Health Promotion, Mother and Child Care, Internal Medicine and Medical Specialties, University of Palermo, 90100 Palermo, Italy

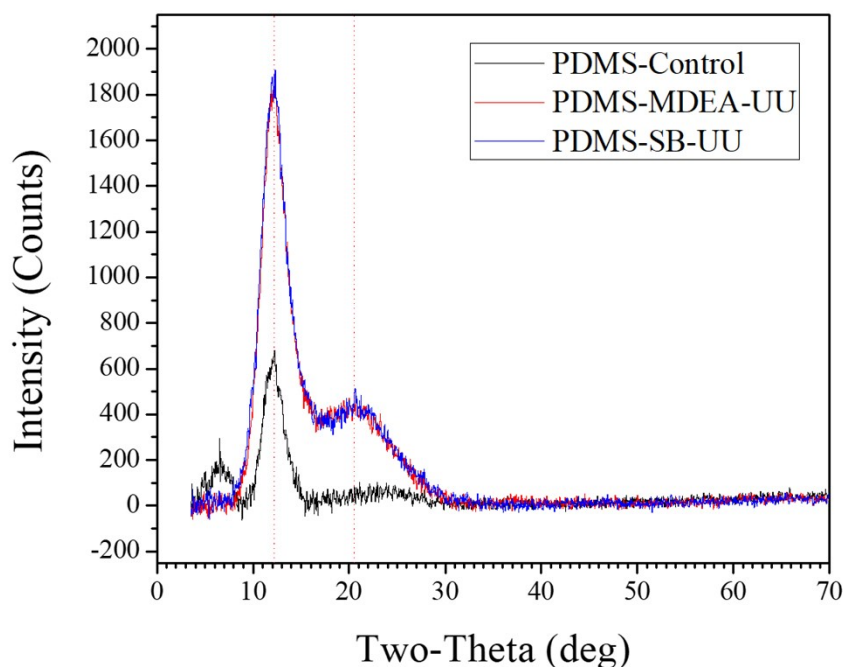

**Supplement Fig. 1.** X-ray diffraction (XRD) spectra of (A) control PDMS, (B) PDMS-MDEA-UU, and (C) PDMS-SB-UU solvent-cast films.

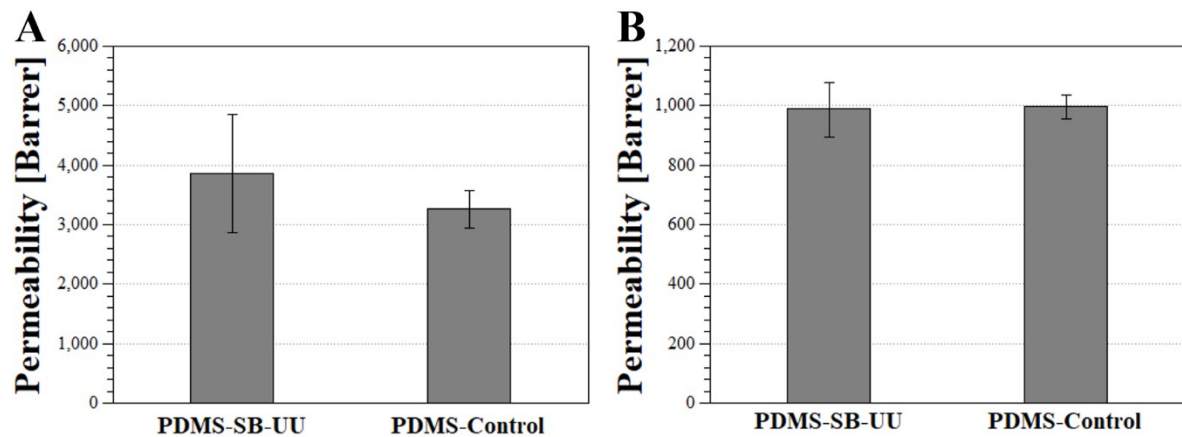

**Supplement Fig. 2.** *In vitro* (A) CO<sub>2</sub> and (B) O<sub>2</sub> permeability test using PDMS-SB-UU and PDMS-control films (n= 4).

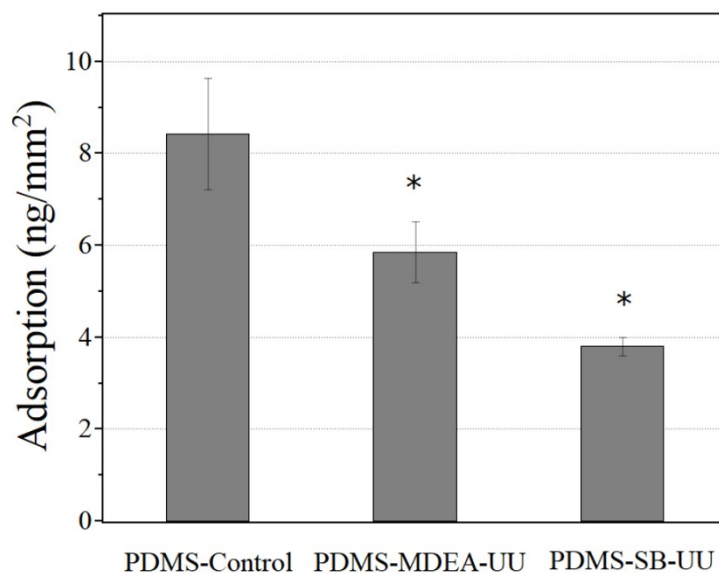

**Supplement Fig. 3.** Protein (fibrinogen) adsorption assay of (A) PDMS-control, (B) PDMS-MDEA-UU, (C) PDMS-SB-UU films (n=3).

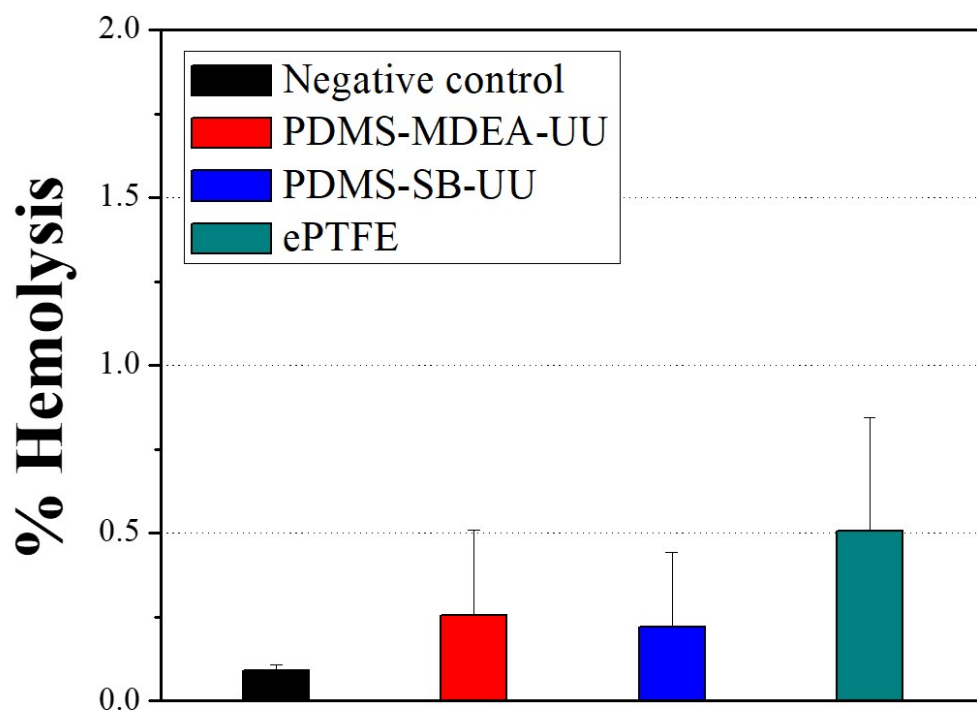

**Supplement Fig. 4.** Hemolysis % of negative control, PDMS-MDEA-UU film, PDMS-SB-UU film, and ePTFE graft against whole ovine blood (8 g/dL of hemoglobin) (n=3).

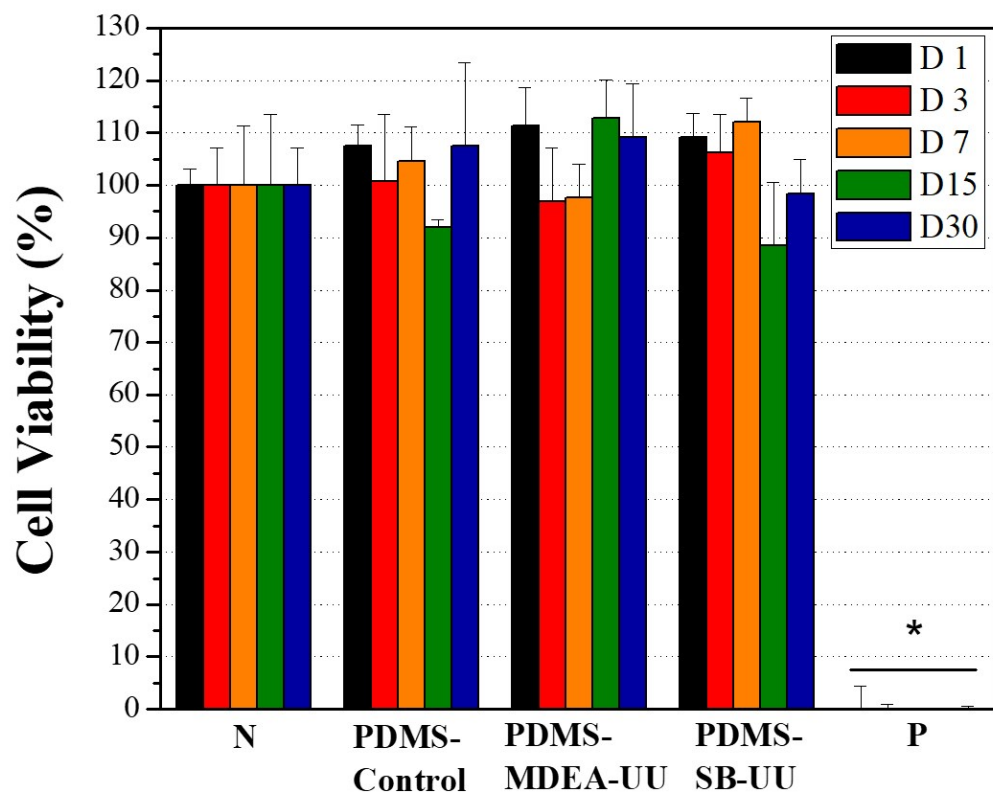

**Supplement Fig. 5.** *In vitro* cytotoxicity of PDMS-control, PDMS-MDEA-UU, and PDMS-SB-UU films tested with rat aorta smooth muscle cells (rSMCs). MTS assay was conducted for analyzing cell viability. Data are normalized to the negative control and expressed as mean  $\pm$  SD ( $n = 3$ ). Negative control (N) includes cells cultured in the medium only. To induce cell death in positive control (P), 1 M acrylamide dissolved in regular cell culture medium was used.

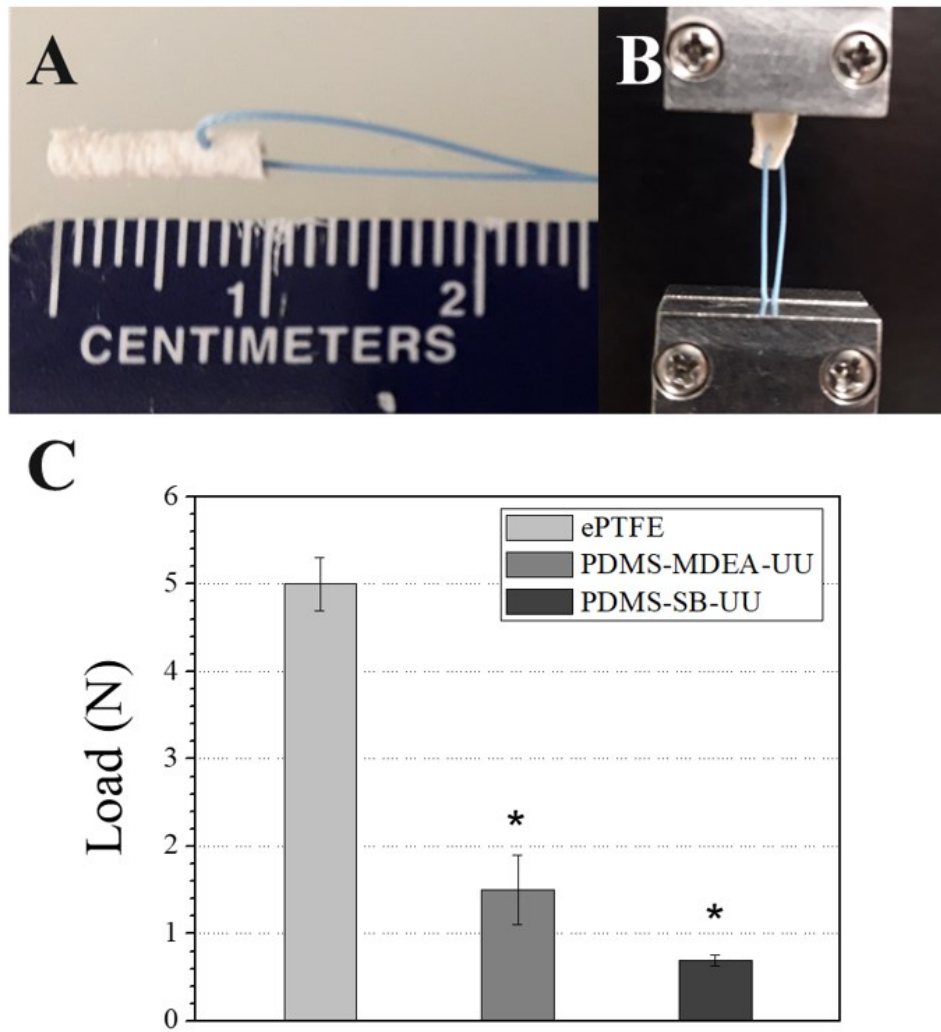

**Supplement Fig. 6.** Suture retention test of electrospun PDMS-SB-UU conduit. Ti-Cron™ coated Braided polyester (5x18") was sutured at a distance of 3 mm from the sample's (thickness: 300  $\mu$ m) free end. Test Speed: 25 mm/min (n=3).

**(A) Polyurethane catheter**

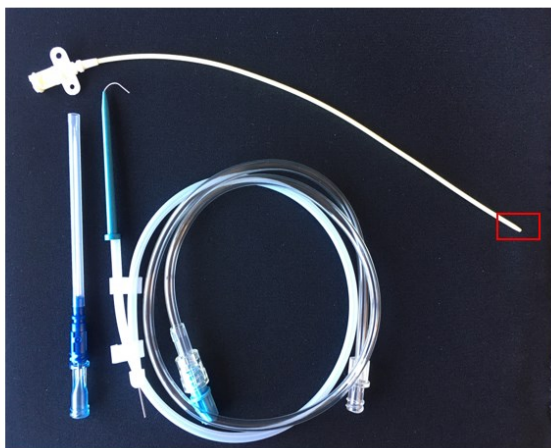

**PDMS-SB-UU coated**

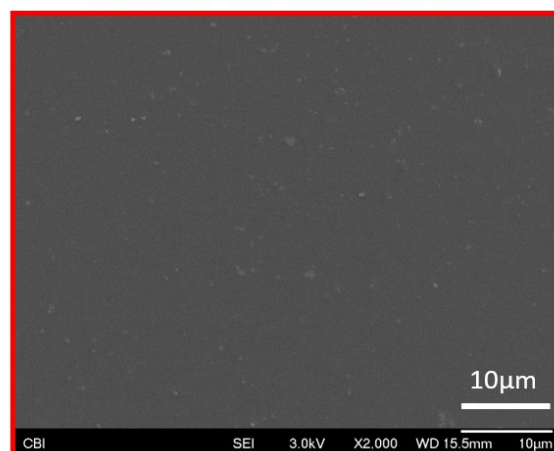

**(B) Silicone catheter**

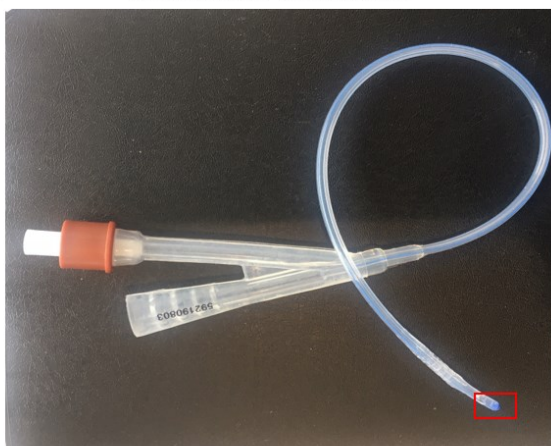

**PDMS-SB-UU coated**

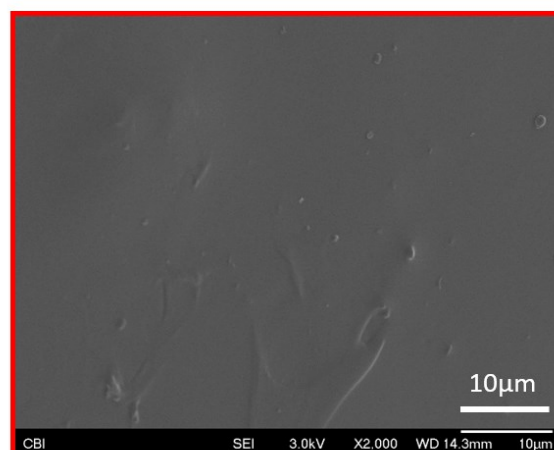

**Supplement Fig. 7.** (A) A central venous catheterization kit with polyurethane indwelling catheter and an electron micrograph of PDMS-SB-UU coated the polyurethane catheter surface. (B) A two-way silicone foley catheter and an electron micrograph of PDMS-SB-UU coated on the silicone catheter surface.

**(A) Polypropylene Hollow fiber control**

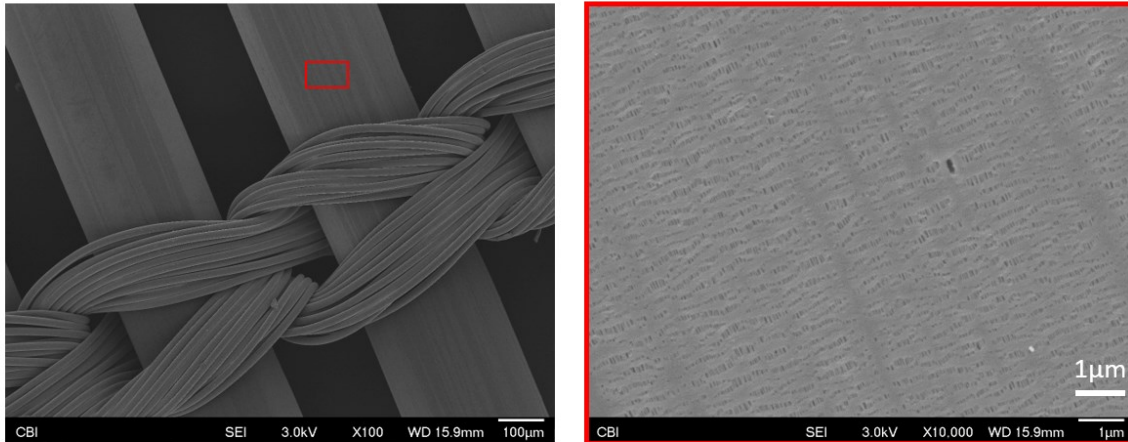

**(B) PDMS-SB-UU coated**

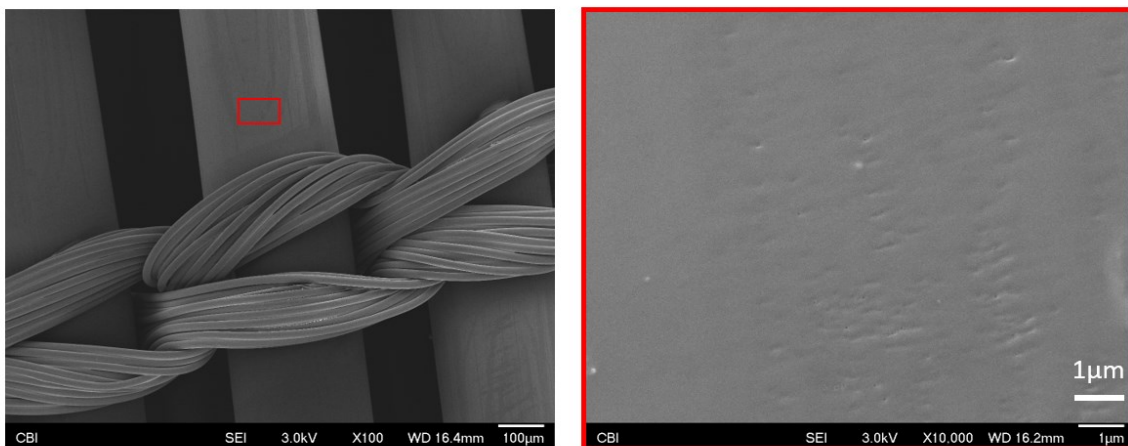

**Supplement Fig. 8.** Electron micrographs of (A) commercial polypropylene hollow fiber mat and the high magnification image of the hollow fiber surface of (B) PDMS-SB-UU coated polypropylene hollow fiber mat and the high magnification image of the coated hollow fiber surface.
